# Supplementary material for: Metal oxide adsorption on fullerene C60 and its potential for adsorption of pollutant gases; density functional theory studies
Source: Royal Society of Chemistry journal article supplement (doi:10.1039/d1ra02251b), 2021-01-01
Supplement: d1ra02251b1.pdf [file d1ra02251b1.pdf]

# **Electronic Supplementary Information**

**for:**

## **Metal Oxide Adsorption on Fullerene C<sub>60</sub> and its Potential for Adsorption of Pollutant Gases; Density Functional Theory Studies**

Sanaz Haghgoo, A-Reza Nekoei<sup>\*a</sup>

<sup>a</sup> Department of Chemistry, Shiraz University of Technology, Shiraz 71555-313, Iran.

E-mail: nekoei@sutech.ac.ir; Tel: +987137354501

**Table S1** Absolute energies and their ZPE corrected values (in a.u.), of all studied monomers and the most stable complexes, calculated at B97D/6-311G(d,p) level of theory

| <b>Structure</b>                                   | <b>E<sub>abs.</sub></b> | <b>E<sub>abs.</sub>+ZPE</b> |
|----------------------------------------------------|-------------------------|-----------------------------|
| NO <sub>2</sub> /C <sub>60</sub>                   | -2489.896304            | -2489.523166                |
| CO/C <sub>60</sub>                                 | -2398.139382            | -2397.769755                |
| NO <sub>2</sub>                                    | -205.029111             | -205.020572                 |
| CO                                                 | -113.275020             | -113.270159                 |
| NO <sub>2</sub> /Cu <sub>2</sub> O                 | -3562.607076            | -3562.593476                |
| NO <sub>2</sub> /ZnO                               | -2060.310758            | -2060.299128                |
| NO <sub>2</sub> /NiO                               | -1789.119825            | -1789.106436                |
| CO/Cu <sub>2</sub> O                               | -3470.834605            | -3470.823389                |
| CO/ZnO                                             | -1968.654358            | -1968.642795                |
| CO/NiO                                             | -1697.365321            | -1697.353815                |
| Cu <sub>2</sub> O                                  | -3357.470973            | -3357.467955                |
| ZnO                                                | -1855.171485            | -1855.170149                |
| NiO                                                | -1583.876049            | -1583.874315                |
| Cu <sub>2</sub> O/C <sub>60</sub>                  | -5642.474147            | -5642.107002                |
| ZnO/C <sub>60</sub>                                | -4140.139071            | -4139.772875                |
| NiO/C <sub>60</sub>                                | -3868.943216            | -3868.575763                |
| C <sub>60</sub>                                    | -2284.860930            | -2284.496922                |
| NO <sub>2</sub> /Cu <sub>2</sub> O/C <sub>60</sub> | -5847.573250            | -5847.194380                |
| NO <sub>2</sub> /ZnO/C <sub>60</sub>               | -4345.253214            | -4344.876550                |
| NO <sub>2</sub> /NiO/C <sub>60</sub>               | -4074.057869            | -4073.677722                |
| CO/Cu <sub>2</sub> O/C <sub>60</sub>               | -5755.813970            | -5755.438505                |
| CO/ZnO/C <sub>60</sub>                             | -4253.443014            | -4253.069440                |
| CO/NiO/C <sub>60</sub>                             | -3982.349337            | -3981.972529                |
